# Supplementary material for: Improving Cycle Life of Zinc–Air Batteries with Calcium Ion Additive in Electrolyte or Separator
Source: MDPI journal article supplement (doi:10.3390/nano13121864), 2023-06-15
Supplement: s1 [file s1]

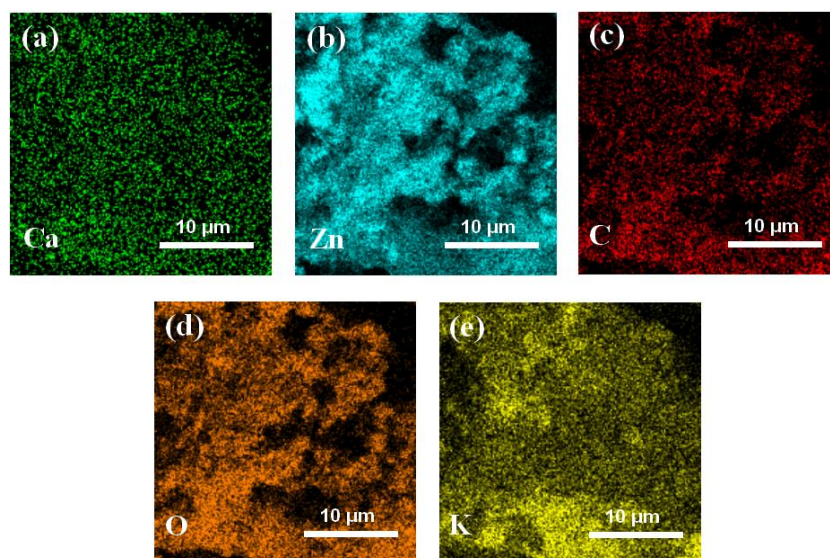

Figure S1. Element distribution of Zn anode after cycle testing of ZAB with modified electrolyte: (a) Ca, (b) Zn, (c) C, (d) O and (e) K.

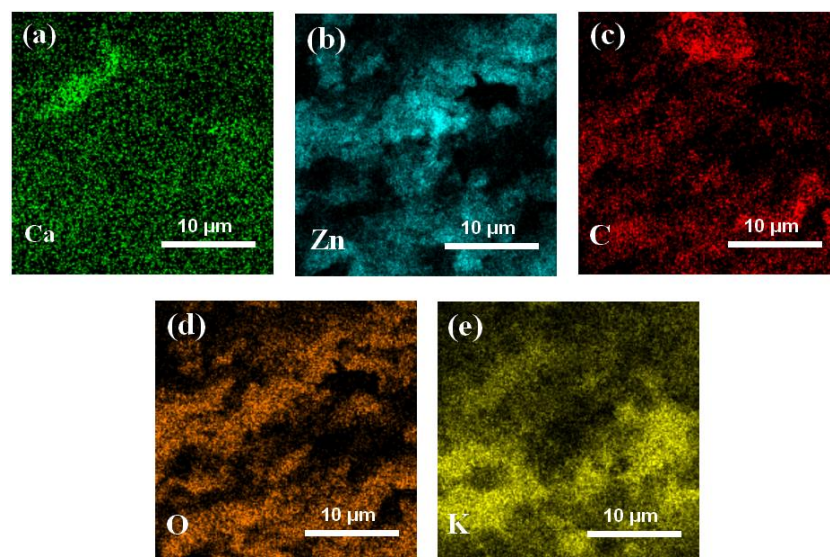

Figure S2. Element distribution of Zn anode after cycle testing of ZAB with modified separator: (a) Ca, (b) Zn, (c) C, (d) O and (e) K.

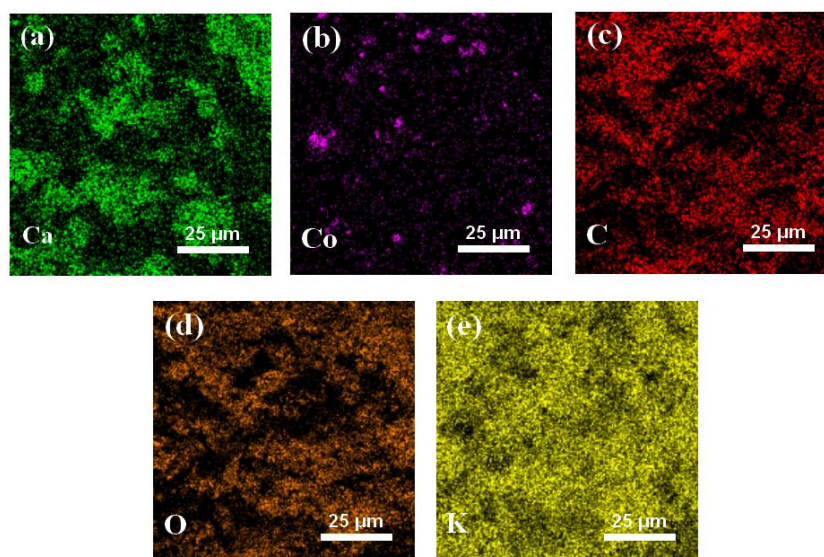

Figure S3. Element distribution of air cathode after cycle testing of ZAB with modified electrolyte: (a) Ca, (b) Co, (c) C, (d) O and (e) K.

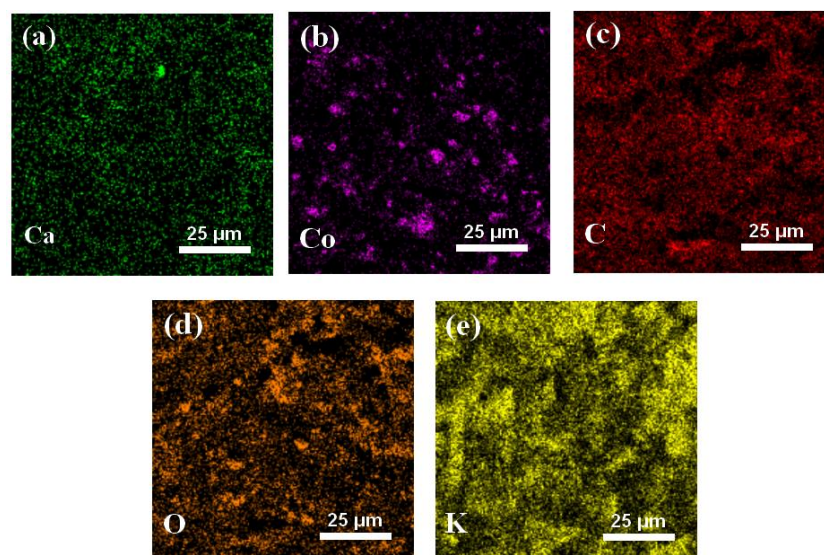

Figure S4. Element distribution of air cathode after cycle testing of ZAB with modified separator: (a) Ca, (b) Co, (c) C, (d) O and (e) K.



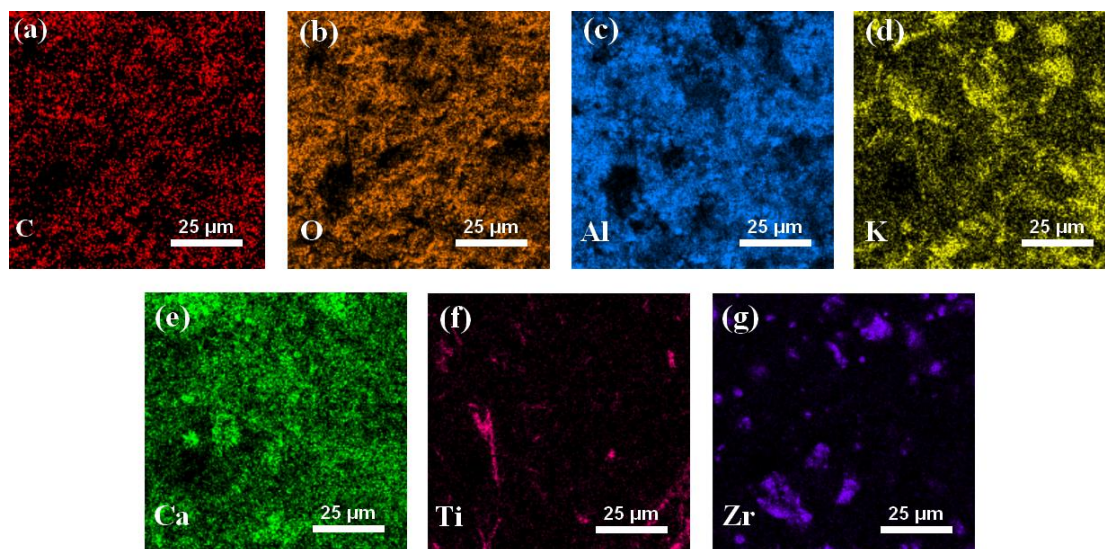

Figure S5. Element distribution of the modified separator before cycle testing of ZAB: (a) C, (b) O, (c) Al, (d) K, (e) Ca, (f) Ti and (g) Zr.

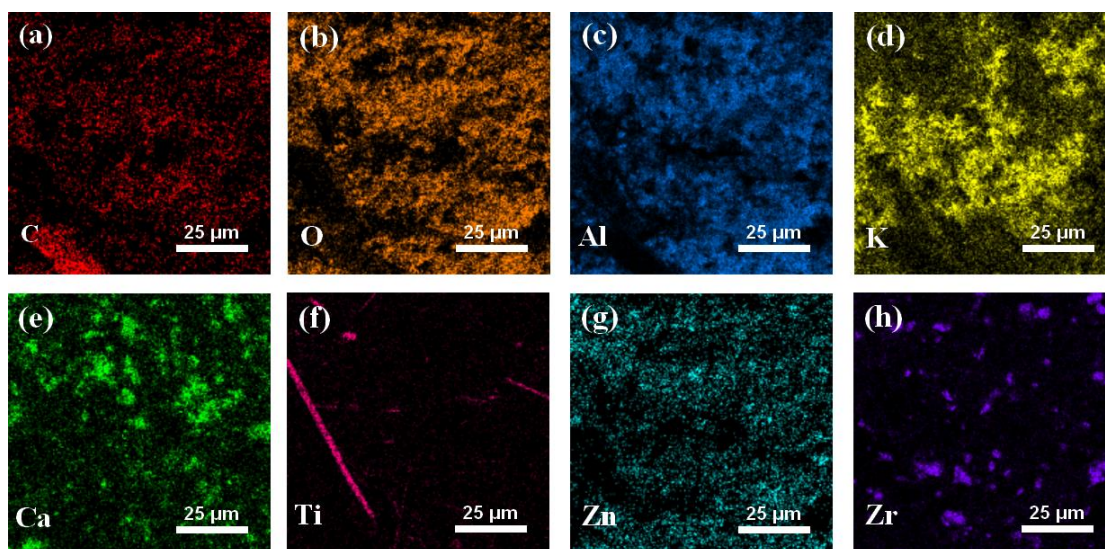

Figure S6. Element distribution of the modified separator at the side contacting with Zn anode after cycle testing of ZAB: (a) C, (b) O, (c) Al, (d) K, (e) Ca, (f) Ti, (g) Zn and (h) Zr.

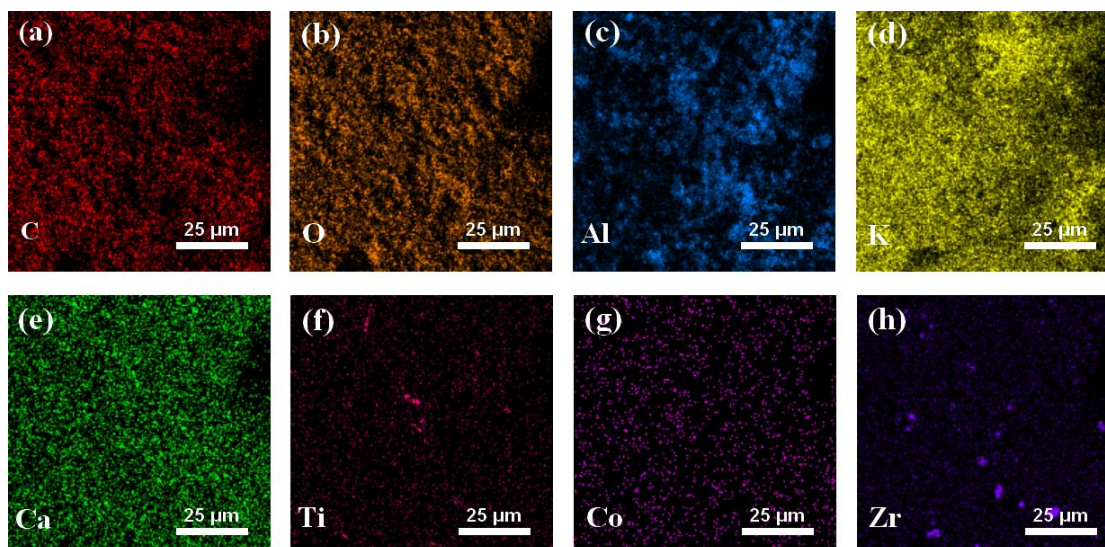

Figure S7. Element distribution of the modified separator at the side contacting with air cathode after cycle testing of ZAB: (a) C, (b) O, (c) Al, (d) K, (e) Ca, (f) Ti, (g) Co and (h) Zr.

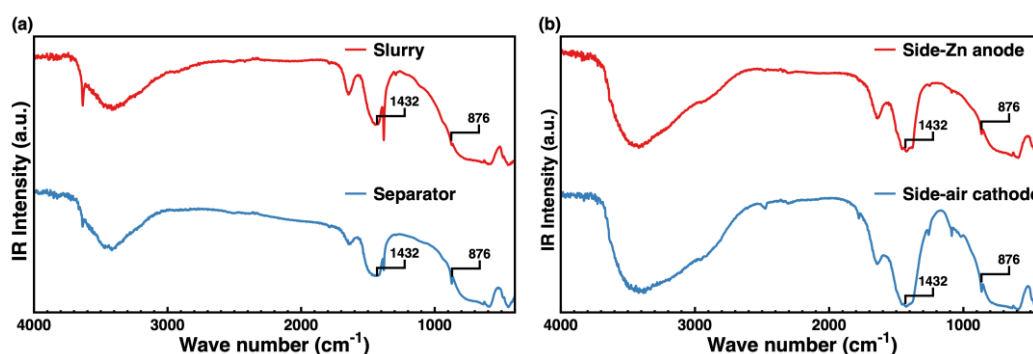

Figure S8. FT-IR patterns of the modified separator (a) before and (b) after cycle testing of ZAB.

Table S1. Element content of Zn anode after cycle testing of ZAB with modified electrolyte.

| Element | wt%    | At%    |
|---------|--------|--------|
| C K     | 14.06  | 30.25  |
| O K     | 26.80  | 43.28  |
| K K     | 11.59  | 7.66   |
| Ca K    | 0.11   | 0.07   |
| Zn L    | 47.43  | 18.74  |
| Total   | 100.00 | 100.00 |

Table S2. Element content of Zn anode after cycle testing of ZAB with modified separator.

| Element | wt%   | At%   |
|---------|-------|-------|
| C K     | 13.48 | 28.59 |
| O K     | 25.70 | 40.92 |

|       |        |        |
|-------|--------|--------|
| K K   | 25.45  | 16.58  |
| Ca K  | 0.53   | 0.33   |
| Zn L  | 34.84  | 13.58  |
| Total | 100.00 | 100.00 |

Table S3. Element content of air cathode after cycle testing of ZAB with modified electrolyte.

| Element | wt%    | At%    |
|---------|--------|--------|
| C K     | 14.15  | 24.25  |
| O K     | 41.21  | 53.01  |
| K K     | 35.83  | 18.86  |
| Ca K    | 4.93   | 2.53   |
| Zn L    | 3.88   | 1.35   |
| Total   | 100.00 | 100.00 |

Table S4. Element content of air cathode after cycle testing of ZAB with modified separator.

| Element | wt%    | At%    |
|---------|--------|--------|
| C K     | 37.41  | 55.80  |
| O K     | 26.02  | 29.14  |
| K K     | 24.92  | 11.42  |
| Ca K    | 0.66   | 0.30   |
| Co K    | 10.99  | 3.34   |
| Total   | 100.00 | 100.00 |

Table S5. Element content of the modified separator before cycle testing of ZAB.

| Element | wt%   | At%   |
|---------|-------|-------|
| C K     | 10.44 | 18.34 |
| O K     | 36.47 | 48.10 |

---

|       |        |        |
|-------|--------|--------|
| Al K  | 29.47  | 23.05  |
| K K   | 7.61   | 4.11   |
| Ca K  | 8.05   | 4.24   |
| Ti K  | 1.56   | 0.69   |
| Zr L  | 6.40   | 1.48   |
| Total | 100.00 | 100.00 |

---

Table S6. Element content of the modified separator at the side contacting with Zn anode after cycle testing of ZAB.

| Element | wt%    | At%    |
|---------|--------|--------|
| C K     | 10.31  | 18.79  |
| O K     | 33.53  | 45.84  |
| Al K    | 25.48  | 20.66  |
| K K     | 16.89  | 9.45   |
| Ca K    | 4.50   | 2.46   |
| Ti K    | 1.62   | 0.74   |
| Zn L    | 2.38   | 0.80   |
| Zr L    | 5.29   | 1.27   |
| Total   | 100.00 | 100.00 |

---

Table S7. Element content of the modified separator at the side contacting with air cathode after cycle testing of ZAB.

| Element | wt%    | At%    |
|---------|--------|--------|
| C K     | 18.03  | 29.60  |
| O K     | 36.21  | 44.62  |
| Al K    | 12.23  | 8.93   |
| K K     | 31.34  | 15.80  |
| Ca K    | 1.99   | 0.98   |
| Ti K    | 0.18   | 0.07   |
| Co K    | 0.02   | 0.01   |
| Zr L    | 0.00   | 0.00   |
| Total   | 100.00 | 100.00 |

---
